# Supplementary material
Source: MDPI journal article supplement (https://www.mdpi.com/2079-9276/11/10/84)
Supplement: s1 [file s1]

Article - Supplementary material

# Relationship of Photosynthetic Activity of *Polygonum acuminatum* and *Ludwigia lagunae* with Physicochemical Aspects of Greywater in a Zero-Liquid Discharge System

Karen Takahashi <sup>1</sup>, Gabriela Araújo <sup>1</sup>, Vali Pott <sup>2</sup>, Nídia Yoshida <sup>3</sup>, Liana Lima <sup>2</sup>, Anderson Caires <sup>4</sup> and Paula Paulo <sup>1,\*</sup>Table S1. Correlation data between *Fv/Fm* and physicochemical parameters for the four irrigation solutions used for *L. lagunae* and *P. acuminatum*.

|              | <i>P. acuminatum</i> |         |                 |         |                 |         |                 |         |                 |         |                 |         |                   |         |                 |         |
|--------------|----------------------|---------|-----------------|---------|-----------------|---------|-----------------|---------|-----------------|---------|-----------------|---------|-------------------|---------|-----------------|---------|
|              | TW                   |         |                 |         | TW*             |         |                 |         | GW <sub>L</sub> |         |                 |         | GW <sub>L</sub> * |         |                 |         |
|              | I                    |         | M               |         | I               |         | M               |         | I               |         | M               |         | I                 |         | M               |         |
|              | Rô de Spear-man      | valor-p | Rô de Spear-man | valor-p | Rô de Spear-man | valor-p | Rô de Spear-man | valor-p | Rô de Spear-man | valor-p | Rô de Spear-man | valor-p | Rô de Spear-man   | valor-p | Rô de Spear-man | valor-p |
| <b>pH</b>    | -0.18                | 0.34    | 0.10            | 0.61    | -0.26           | 0.15    | -0.12           | 0.53    | -0.29           | 0.12    | -0.09           | 0.64    | -0.06             | 0.78    | 0.13            | 0.50    |
| <b>TEMP</b>  | -0.35                | 0.06    | -0.16           | 0.39    | -0.13           | 0.47    | -0.22           | 0.24    | <b>-0.71</b>    | 0.00    | -0.57           | 0.00    | -0.04             | 0.83    | 0.16            | 0.40    |
| <b>EC</b>    | -0.32                | 0.09    | 0.25            | 0.20    | 0.33            | 0.07    | 0.09            | 0.63    | -0.24           | 0.19    | -0.48           | 0.01    | 0.09              | 0.65    | 0.14            | 0.47    |
| <b>SAL</b>   | -0.06                | 0.74    | 0.24            | 0.21    | 0.18            | 0.33    | 0.22            | 0.25    | -0.35           | 0.05    | -0.48           | 0.01    | 0.08              | 0.68    | 0.13            | 0.49    |
| <b>TDS</b>   | -0.07                | 0.73    | 0.14            | 0.47    | 0.19            | 0.33    | 0.10            | 0.60    | -0.41           | 0.02    | -0.20           | 0.29    | 0.00              | 0.98    | 0.12            | 0.54    |
| <b>ORP</b>   | 0.14                 | 0.46    | 0.02            | 0.92    | 0.04            | 0.83    | 0.07            | 0.72    | 0.12            | 0.53    | <b>0.80</b>     | 0.00    | -0.11             | 0.59    | 0.12            | 0.53    |
| <b>DO</b>    | -0.12                | 0.51    | -0.06           | 0.75    | -0.09           | 0.63    | 0.09            | 0.63    | 0.60            | 0.00    | <b>0.68</b>     | 0.00    | -0.32             | 0.11    | -0.16           | 0.42    |
| <b>EVAPO</b> |                      |         | 0.14            | 0.47    |                 |         | 0.01            | 0.97    |                 |         | -0.11           | 0.58    |                   |         | -0.03           | 0.86    |

| <i>L. lagunae</i> |                        |             |                        |             |                        |             |                        |             |                        |             |                        |             |                        |             |                        |             |
|-------------------|------------------------|-------------|------------------------|-------------|------------------------|-------------|------------------------|-------------|------------------------|-------------|------------------------|-------------|------------------------|-------------|------------------------|-------------|
|                   | TW                     |             |                        |             | TW*                    |             |                        |             | GW <sub>L</sub>        |             |                        |             | GW <sub>L</sub> *      |             |                        |             |
|                   | I                      |             | M                      |             | I                      |             | M                      |             | I                      |             | M                      |             | I                      |             | M                      |             |
|                   | Rô de<br>Spear-<br>man | valor-<br>P |
| <b>pH</b>         | -0.08                  | 0.68        | -0.11                  | 0.56        | -0.65                  | 0.00        | -0.18                  | 0.34        | -0.26                  | 0.40        | -0.39                  | 0.21        | -0.51                  | 0.00        | -0.10                  | 0.61        |
| <b>TEMP</b>       | -0.31                  | 0.09        | -0.26                  | 0.15        | -0.36                  | 0.05        | -0.29                  | 0.12        | 0.24                   | 0.43        | 0.18                   | 0.59        | -0.29                  | 0.12        | -0.16                  | 0.38        |
| <b>EC</b>         | -0.45                  | 0.01        | -0.34                  | 0.06        | 0.42                   | 0.02        | 0.53                   | 0.00        | 0.23                   | 0.45        | <b>-0.85</b>           | 0.00        | 0.42                   | 0.22        | -0.14                  | 0.45        |
| <b>SAL</b>        | 0.00                   | 0.05        | -0.30                  | 0.10        | 0.44                   | 0.01        | 0.41                   | 0.02        | 0.14                   | 0.65        | <b>-0.76</b>           | 0.00        | 0.41                   | 0.03        | -0.10                  | 0.58        |
| <b>TDS</b>        | -0.12                  | 0.51        | -0.07                  | 0.72        | 0.65                   | 0.00        | <b>0.73</b>            | 0.00        | -0.34                  | 0.26        | -0.29                  | 0.37        | 0.17                   | 0.39        | 0.30                   | 0.11        |
| <b>ORP</b>        | -0.02                  | 0.91        | 0.52                   | 0.00        | -0.01                  | 0.95        | 0.49                   | 0.01        | -0.45                  | 0.12        | 0.47                   | 0.12        | 0.17                   | 0.37        | 0.44                   | 0.01        |
| <b>DO</b>         | -0.11                  | 0.56        | 0.19                   | 0.31        | -0.36                  | 0.05        | 0.65                   | 0.00        | 0.50                   | 0.08        | <b>0.78</b>            | 0.00        | -0.12                  | 0.53        | 0.59                   | 0.00        |
| <b>EVAPO</b>      |                        |             | 0.06                   | 0.73        |                        |             | -0.42                  | 0.02        |                        |             | -0.42                  | 0.18        |                        |             | -0.27                  | 0.15        |

TW: tap water (control group); TW\*: tap water + nutrients; GW<sub>L</sub>: laundry greywater; GW<sub>L</sub>\*: laundry greywater + nutrients; TEMP: temperature; E.C.: electrical conductivity; SAL: salinity; ORP: oxi-reduction potential; DO: dissolved oxygen; TDS: total dissolved solids; EVAPO: evapotranspiration; I: irrigation solution; M: mesocosm (piezometer, SP1).

**Table S1.** Physicochemical data measured in the piezometer (SP1) and from the collected effluent samples (SP2).

|                      |            | pH             | Temp (°C)       | EC (μS cm <sup>-1</sup> ) | SAL (%)        | TDS (mg L <sup>-1</sup> ) |
|----------------------|------------|----------------|-----------------|---------------------------|----------------|---------------------------|
| <i>P. acuminatum</i> | <b>TW</b>  | 7.08±0.50 (31) | 24.44±3.86 (31) | 228.61±103.52 (29)        | 0.46±0.19 (29) | 117.22±35.55 (29)         |
|                      | <b>TW*</b> | 6.81±0.35 (31) | 24.08±3.74 (31) | 1408.02±1342.33 (31)      | 2.65±2.13 (30) | 807.19±728.00 (30)        |
|                      | <b>GW</b>  | 7.09±0.31 (31) | 24.34±4.45 (31) | 504.08±214.97 (31)        | 1.01±0.39 (31) | 270.63±87.73 (30)         |
|                      | <b>GW*</b> | 6.91±0.27 (31) | 23.93±4.17 (31) | 1832.55±1243.88 (31)      | 3.54±2.40 (31) | 979.56±676.38 (31)        |

|                      |            |                    |                               |                                |                               |                     |
|----------------------|------------|--------------------|-------------------------------|--------------------------------|-------------------------------|---------------------|
| <i>L. lagunae</i>    | <b>TW</b>  | 7.02±0.56 (31)     | 24.70±4.06 (31)               | 232.06±94.82 (31)              | 0.45±0.18 (31)                | 122.54±42.79 (31)   |
|                      | <b>TW*</b> | 6.62±0.29 (28)     | 25.09±4.44 (28)               | 1310.31±1414.81 (26)           | 2.60±2.65 (26)                | 925.81±1334.23 (27) |
|                      | <b>GW</b>  | 7.15±0.28 (31)     | 24.76±4.34 (31)               | 483.05±166.22 (31)             | 0.99±0.31 (31)                | 260.20±72.78 (31)   |
|                      | <b>GW*</b> | 6.86±0.33 (31)     | 24.79±4.45 (31)               | 2765.29±1193.73 (31)           | 5.54±2.20 (31)                | 1512.58±624.26 (31) |
|                      |            | <b>ORP (mV)</b>    | <b>DO (mg L<sup>-1</sup>)</b> | <b>COD (mg L<sup>-1</sup>)</b> | <b>TS (mg L<sup>-1</sup>)</b> |                     |
| <i>P. acuminatum</i> | <b>TW</b>  | 160.78±219.24 (31) | 4.45±0.87 (31)                | 23.94±19.38 (24)               | 246.45±112.33 (23)            |                     |
|                      | <b>TW*</b> | 179.70±210.41 (31) | 3.62±0.80 (31)                | 49.72±48.56 (30)               | 1363.04±1153.57 (28)          |                     |
|                      | <b>GW</b>  | 109.55±220.87 (31) | 2.96±0.94 (31)                | 51.00±49.14 (26)               | 381.77±93.57 (22)             |                     |
|                      | <b>GW*</b> | 74.17±284.00 (31)  | 2.21±1.21 (31)                | 78.00±45.05 (30)               | 1434.42±963.28 (24)           |                     |
| <i>L. lagunae</i>    | <b>TW</b>  | 213.60±164.73 (31) | 4.04±0.96 (31)                | 18.83±13.82 (20)               | 217.13±67.09 (22)             |                     |
|                      | <b>TW*</b> | 199.87±201.10 (27) | 3.41±1.37 (28)                | 118.73±107.35 (23)             | 1342.78±1109.60 (22)          |                     |
|                      | <b>GW</b>  | 183.68±170.57 (31) | 2.85±0.86 (31)                | 53.10±50.56 (26)               | 343.64±98.29 (23)             |                     |
|                      | <b>GW*</b> | 111.38±223.28 (31) | 2.70±1.47 (31)                | 203.70±152.29 (26)             | 2027.53±812.36 (24)           |                     |

TW: tap water (control group); TW\*: tap water + nutrients; GW<sub>L</sub>: laundry greywater; GW<sub>L</sub>\*: laundry greywater + nutrients; TEMP: temperature; E.C.: electrical conductivity; SAL: salinity; TDS: total dissolved solids; ORP: oxi-reduction potential; DO: dissolved oxygen.
